# Supplementary material
Source: PubMed Central journal article supplement (PMC6662596)

# Supplementary Figure 1:

**A**

**Analysis Time Points**

V1124-000 S5745-E712

| Dietary components               | Standard Chow | HFD Palm oil |
|----------------------------------|---------------|--------------|
| <b>Gross Energy (GE)</b>         | 16.7 MJ/kg    | 21.9 MJ/kg   |
| <b>Metabolizable Energy (ME)</b> | 14.0 MJ/kg    | 19.7 MJ/kg   |
| <b>Crude Nutrients [%]</b>       |               |              |
| Protein                          | 27            | 18           |
| Fat                              | 12            | 48           |
| Carbohydrates                    | 61            | 34           |
| <b>Amino Acids [%]</b>           |               |              |
| Lysine                           | 1.5           | 1.8          |
| Methionine                       | 0.5           | 0.8          |
| Met + Cys                        | 0.4           | 1.1          |
| Threonine                        | 0.9           | 0.9          |
| Tryptophan                       | 0.3           | 0.3          |
| <b>Minerals [%]</b>              |               |              |
| Calcium                          | 1.0           | 0.9          |
| Phosphorus                       | 0.7           | 0.7          |
| Sodium                           | 0.2           | 0.2          |
| Magnesium                        | 0.2           | 0.2          |
| <b>Vitamins [IU/kg]</b>          |               |              |
| Vitamin A                        | 25,000.00     | 18,000.00    |
| Vitamin D <sub>3</sub>           | 1,500.00      | 1,800.00     |
| Vitamin E                        | 135           | 180          |
| <b>Fatty acids [%]</b>           |               |              |
| C 12:0                           | -             | 0.01         |
| C 14:0                           | 0.01          | 0.21         |
| C 16:0                           | 0.54          | 9.18         |
| C 18:0                           | 0.14          | 1.11         |
| C 20:0                           | 0.02          | 0.1          |
| C 16:1                           | 0.02          | 0.05         |
| C 18:1                           | 1.03          | 9.19         |
| C 18:2                           | 2.42          | 4.67         |
| C 18:3                           | 0.28          | 0.35         |

**B**

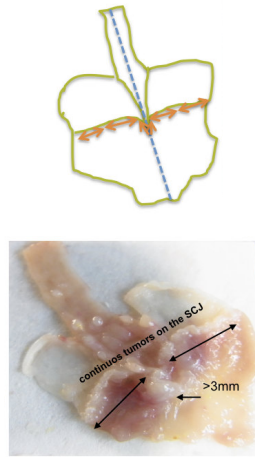

**C**

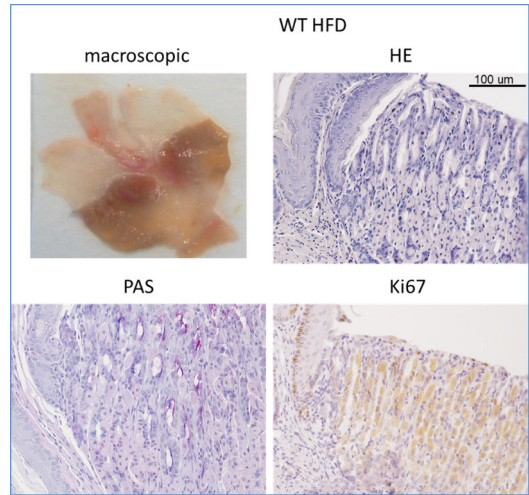

**D**

| Tumor size |                  | Tumor coverage |                            |
|------------|------------------|----------------|----------------------------|
| 0          | No abnormalities | 0              | No abnormalities           |
| 1          | <0.5 mm          | 1              | Focal tumors (<20%)        |
| 2          | >0.5-1 mm        | 2              | Partial tumors (20-50%)    |
| 3          | >1-2 mm          | 3              | Increased tumors (>50-80%) |
| 4          | >2-3 mm          | 4              | Continuous tumors (>80%)   |

**E**

| Score | Inflammation                                     | Metaplasia                  | Dysplasia                      |
|-------|--------------------------------------------------|-----------------------------|--------------------------------|
| 0     | no inflammation<br>no immune cell influx         | no metaplasia               | no dysplasia                   |
| 1     | mild inflammation<br>up to 10 immune cells       | rare mucus cells            | superficial epithelial atypia  |
| 2     | moderate inflammation<br>up to 30 immune cells   | single metaplastic glands   | atypia in glandular complexity |
| 3     | severe inflammation<br>more than 30 immune cells | multiple metaplastic glands | low grade dysplasia            |
| 4     |                                                  |                             | high grade dysplasia           |

**F**

**Fat mass**

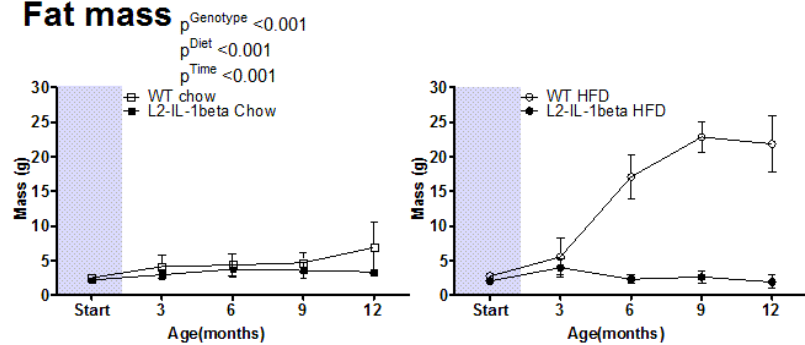

**Lean mass**

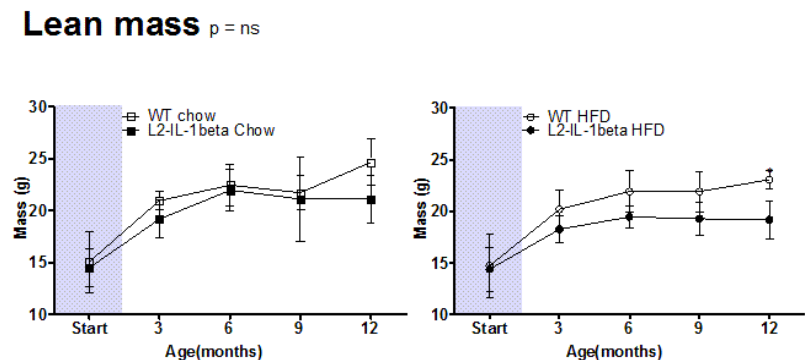

## Supplementary Figure 2:

**A**

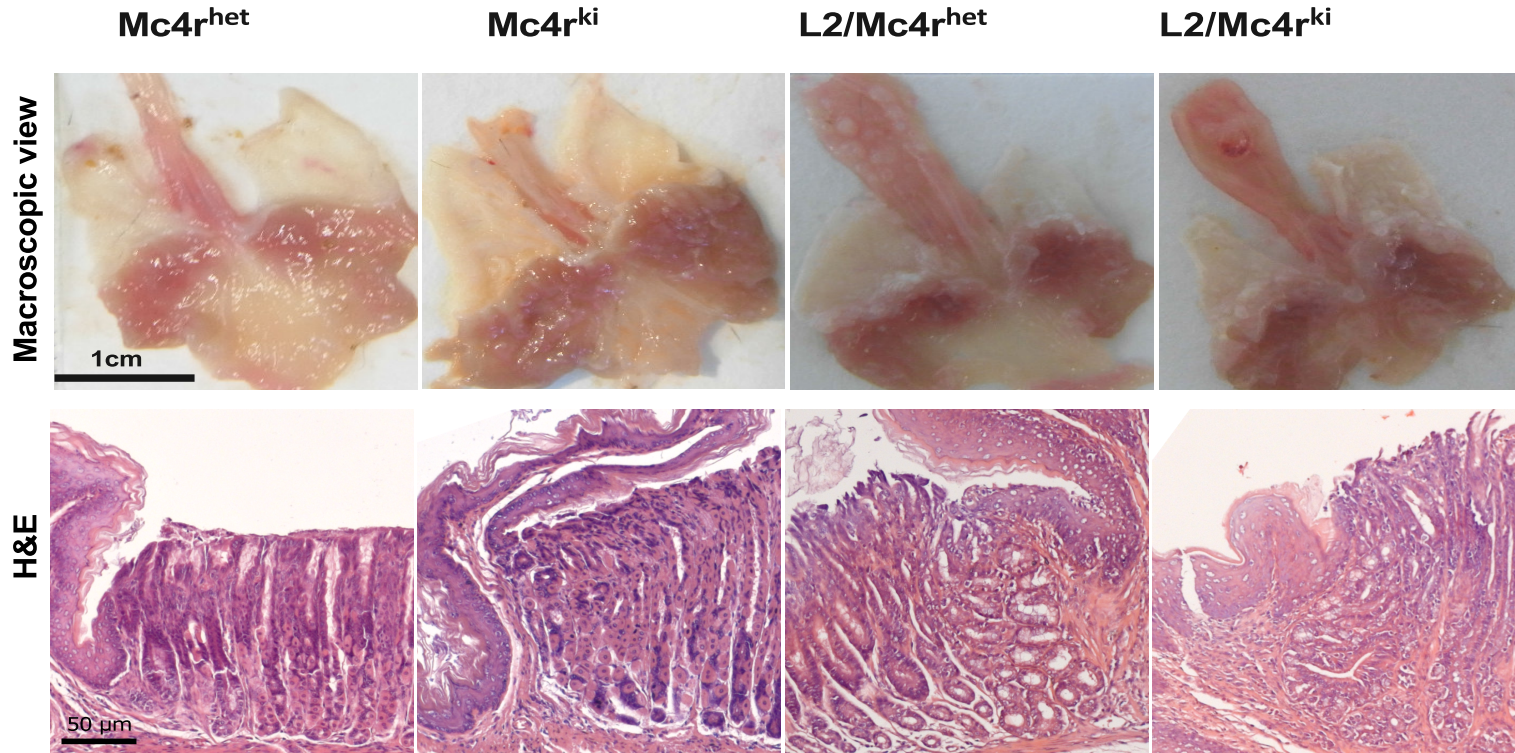

**B**

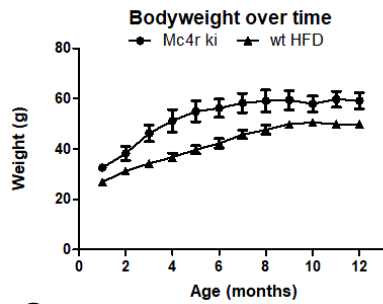

**C**

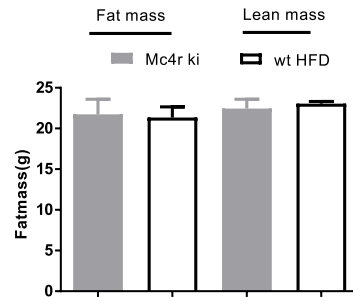

**D**

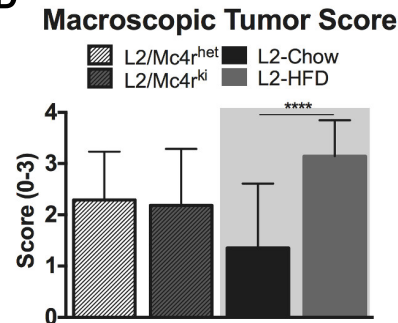

**E**

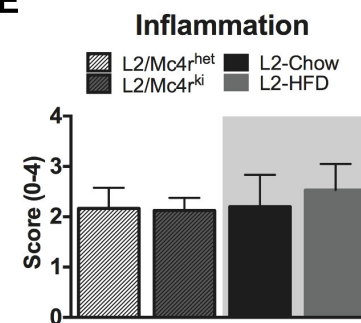

**F**

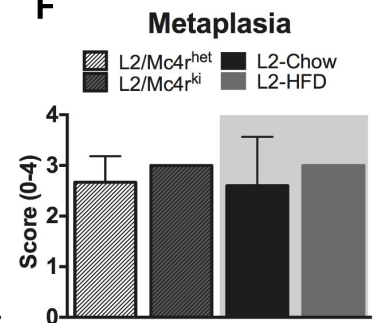

**G**

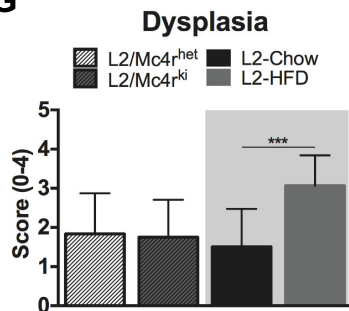

**H**

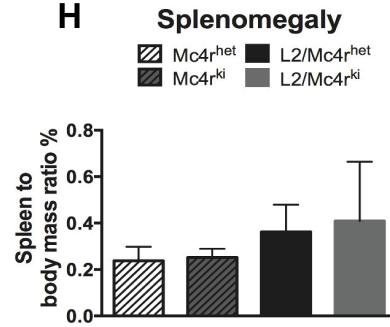

**I**

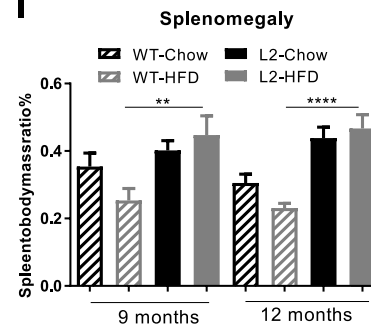

# Supplementary Figure 3:

**A**

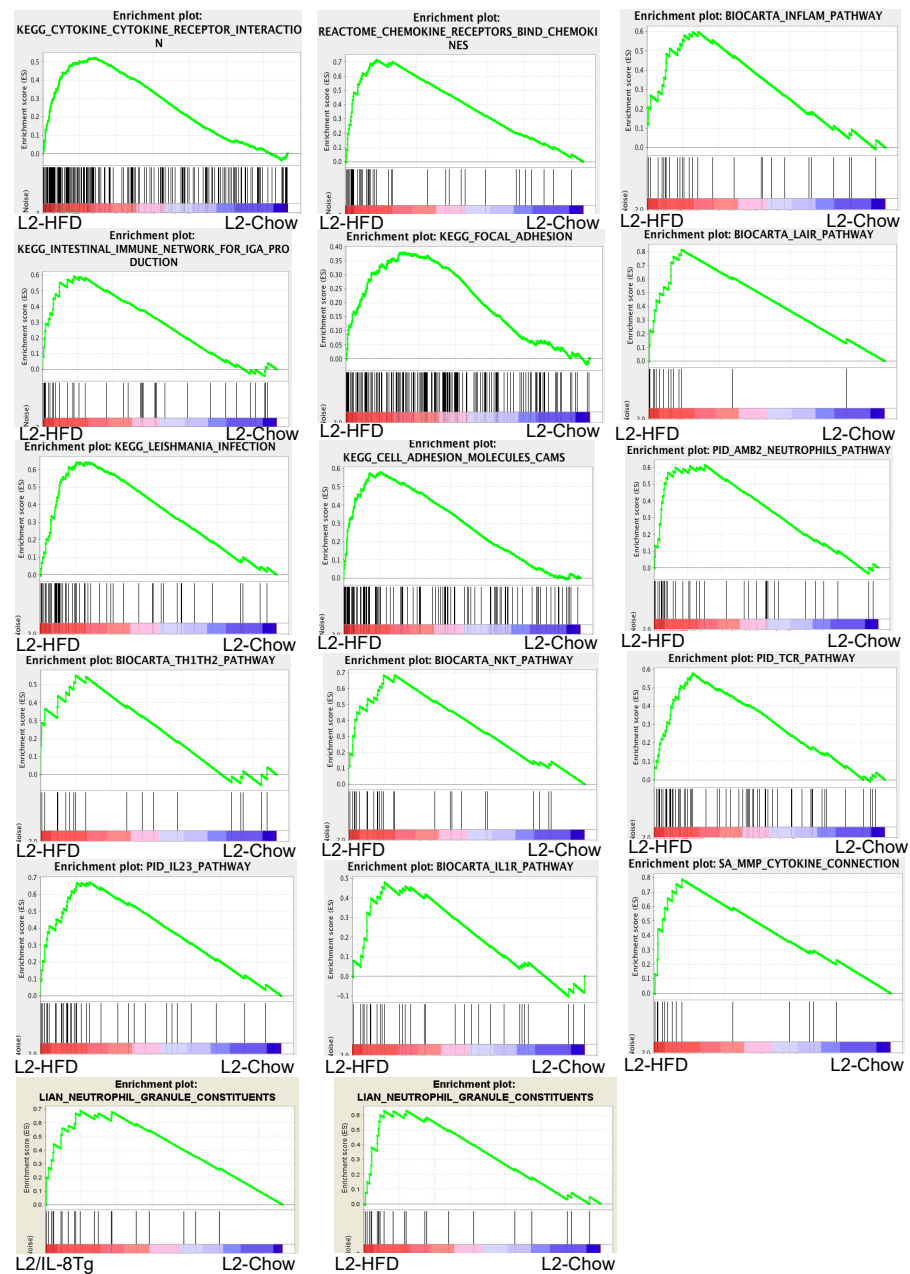

**B**

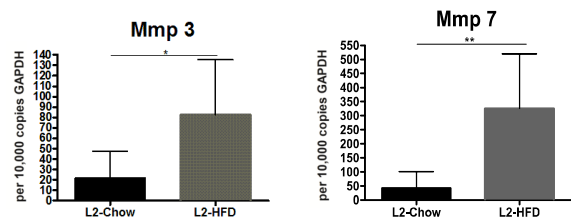

**C**

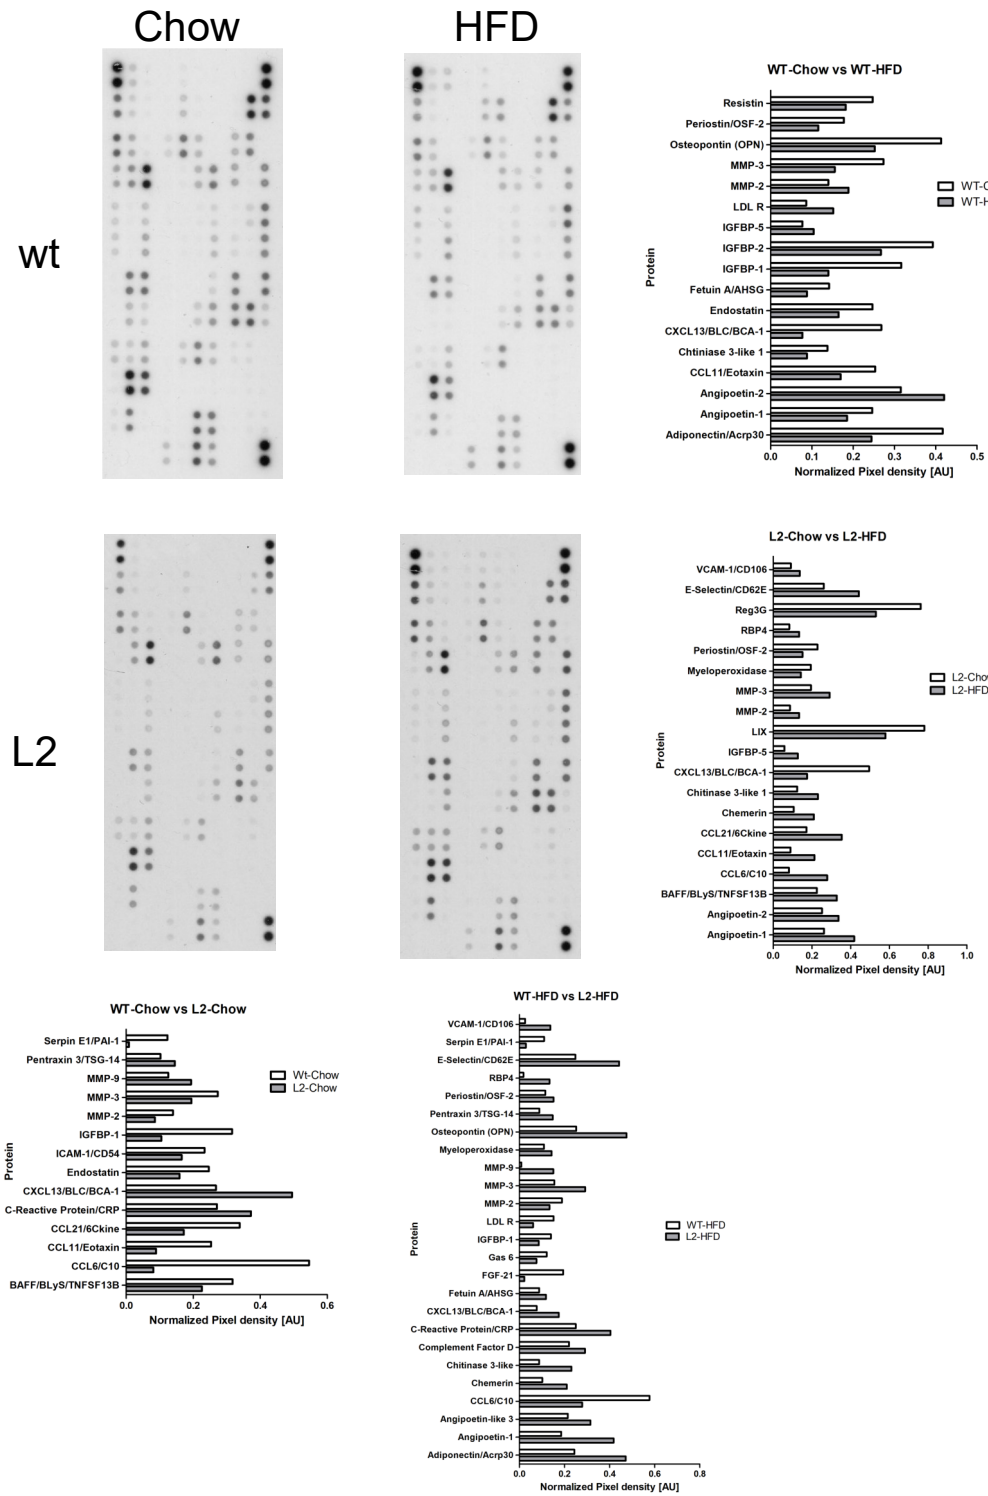

Supplemental Figure4 :

## Serum profiles of lean and obese patients

| Variables                  | All                   | Normal              | Obese                 | p.value |
|----------------------------|-----------------------|---------------------|-----------------------|---------|
| <b>BMI</b>                 |                       |                     |                       |         |
| Males                      | 30.1 (19.5, 49.7)     | 22.4 (19.5,25)      | 37.75 (35.2, 49.7)    | <0.001  |
| Females                    | 36.1 (19.7, 46.1)     | 22.4 (19.7,24.9)    | 38.1 (36.1,46.1)      | <0.001  |
| <b>Age</b>                 |                       |                     |                       |         |
| Males                      | 48 (40, 68)           | 48.5 (40,66)        | 48 (42,68)            | 1       |
| Females                    | 56 (45, 66)           | 57 (47,61)          | 56 (45,66)            | 0.682   |
| <b>CRP</b>                 |                       |                     |                       |         |
| Males                      | 1.21 (0.25, 12.42)    | 0.53 (0.25,4.04)    | 2.78 (0.52,12.42)     | 0.015   |
| Females                    | 2.74 (0.12, 15.04)    | 0.28 (0.12,3.6)     | 6.14 (1.71,15.04)     | <0.001  |
| <b>Adiponectin</b>         |                       |                     |                       |         |
| Males                      | 5.48 (2.61, 22.75)    | 6.59 (4.34,14.68)   | 5.04 (2.61,22.75)     | 0.218   |
| Females                    | 10.37 (2.55, 26.36)   | 18.04 (10.26,26.36) | 6.17 (2.55,19.24)     | <0.001  |
| <b>Leptin</b>              |                       |                     |                       |         |
| Males                      | 6.53 (0.14, 74.41)    | 1.04 (0.14,3.58)    | 19.51 (9.47,74.41)    | <0.001  |
| Females                    | 32.33 (2.77, 68.98)   | 9.28 (2.77,37.75)   | 47.87 (20.76,68.98)   | <0.001  |
| <b>LeptAdipRatio</b>       |                       |                     |                       |         |
| Males                      | 0.44 (0.02, 13.95)    | 0.14 (0.02,0.46)    | 4.87 (0.42,13.95)     | <0.001  |
| Females                    | 2.83 (0.12, 21.3)     | 0.54 (0.12,2.83)    | 8.59 (1.08,21.3)      | <0.001  |
| <b>Insulin</b>             |                       |                     |                       |         |
| Males                      | 5.15 (1.7, 51.39)     | 3.78 (1.7,6.81)     | 12.47 (5.03,51.39)    | <0.001  |
| Females                    | 7.92 (3.45, 28.1)     | 4.79 (3.45,9.3)     | 11.58 (6.85,28.1)     | 0.001   |
| <b>Glucose</b>             |                       |                     |                       |         |
| Males                      | 84.06 (69.34, 109.01) | 78.95 (69.34,98.79) | 89.77 (73.54,109.01)  | 0.028   |
| Females                    | 89.77 (74.14, 111.41) | 84.36 (74.14,93.38) | 102.39 (80.16,111.41) | 0.003   |
| <b>IL-6</b>                |                       |                     |                       |         |
| Males                      | 2.1 (0.68, 6.69)      | 1.72 (0.68,4.95)    | 2.65 (1.4,6.69)       | 0.052   |
| Females                    | 2.41 (0.81, 4.57)     | 1.26 (0.81,1.96)    | 3.14 (2.41,4.57)      | <0.001  |
| <b>Testosterone</b>        |                       |                     |                       |         |
| Males                      | 7.19 (4.8, 13.6)      | 8.2 (5.54,10.02)    | 5.94 (4.8,13.6)       | 0.052   |
| <b>Estradiol</b>           |                       |                     |                       |         |
| Females                    | 20.58 (5.92, 67.31)   | 14.51 (5.92,67.31)  | 26.52 (17.24,34.16)   | 0.006   |
| <b>SHBG</b>                |                       |                     |                       |         |
| Females                    | 55.5 (8.25, 242.97)   | 86.03 (38,242.97)   | 36.89 (8.25,76.29)    | <0.001  |
| <b>Estradiol:SHBGRatio</b> |                       |                     |                       |         |
| Females                    | 0.28 (0.08, 2.5)      | 0.15 (0.08,0.28)    | 0.78 (0.23,2.5)       | <0.001  |

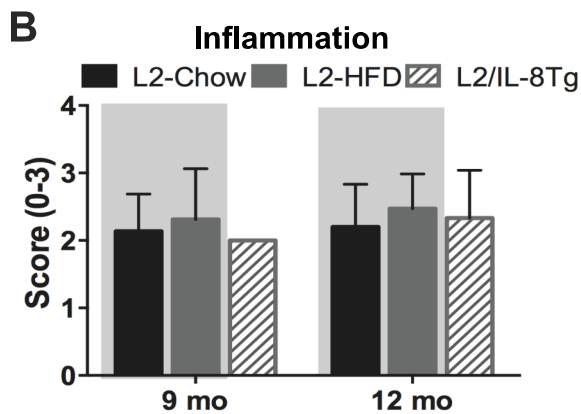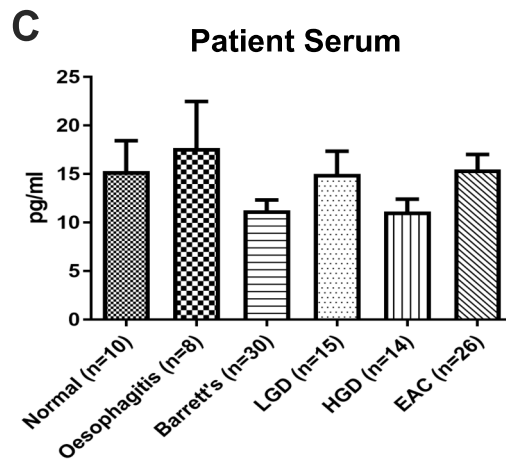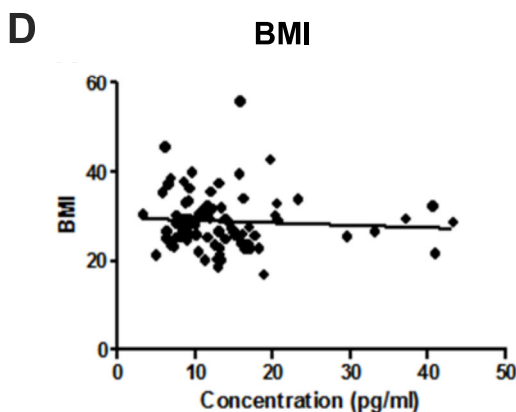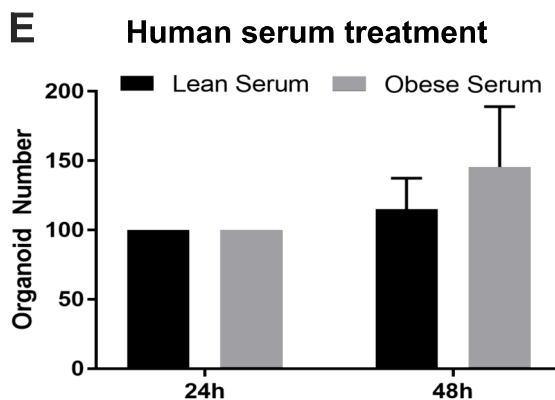

# Supplemental Figure 5 :

**A**

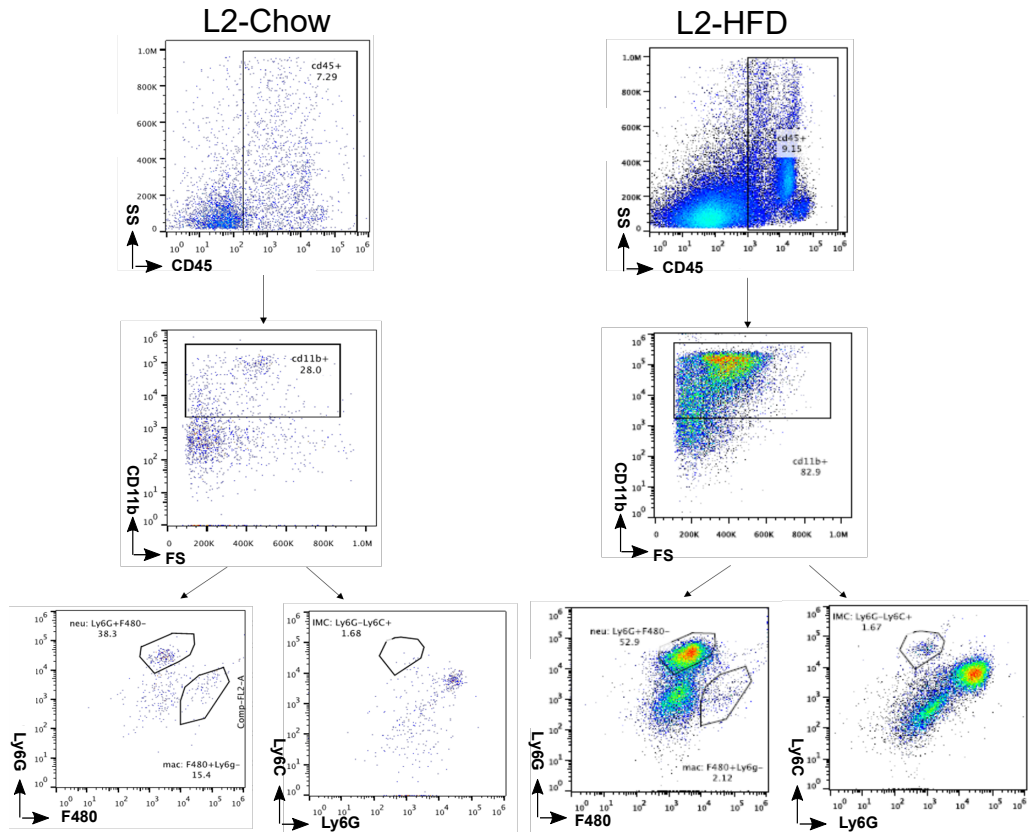

**B**

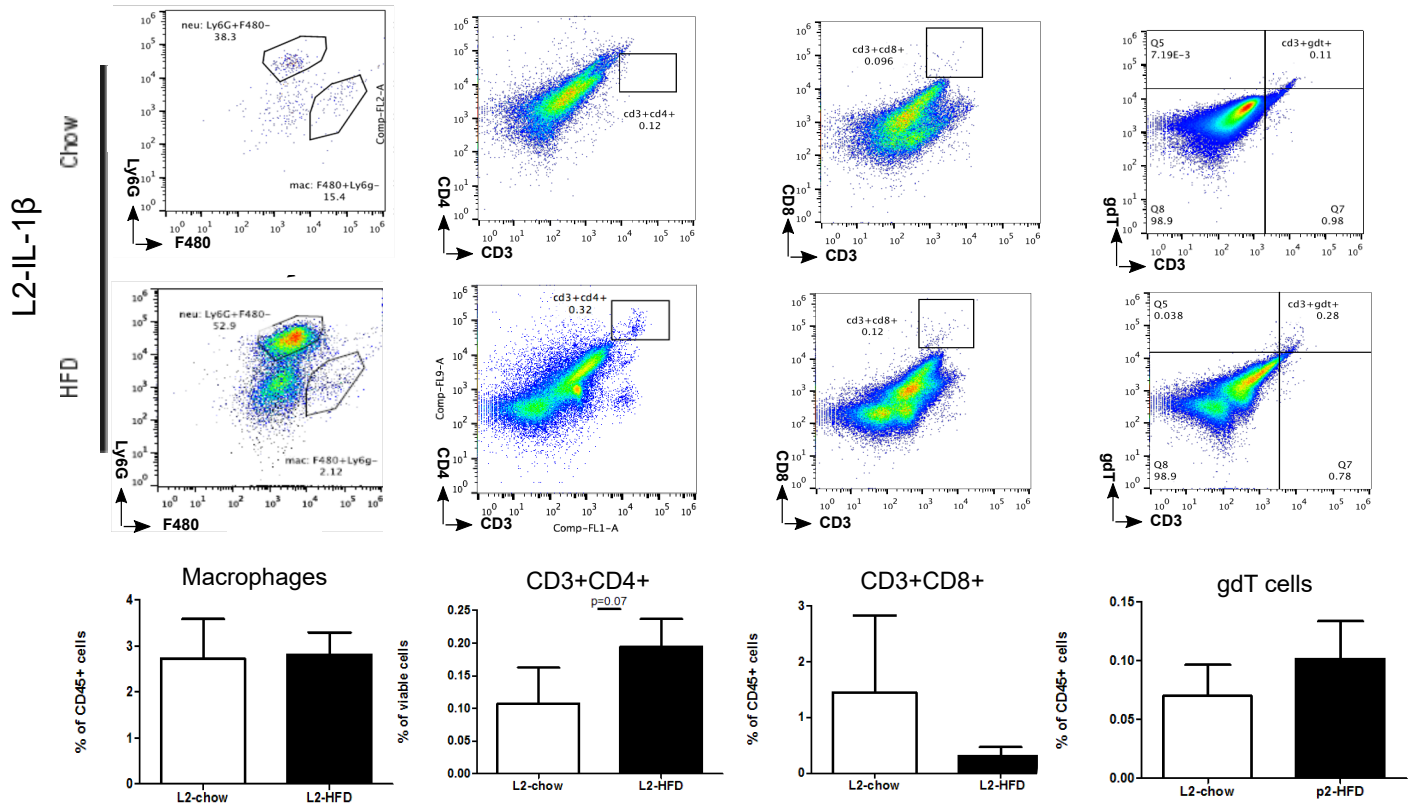

# Supplemental Figure 6

**A**

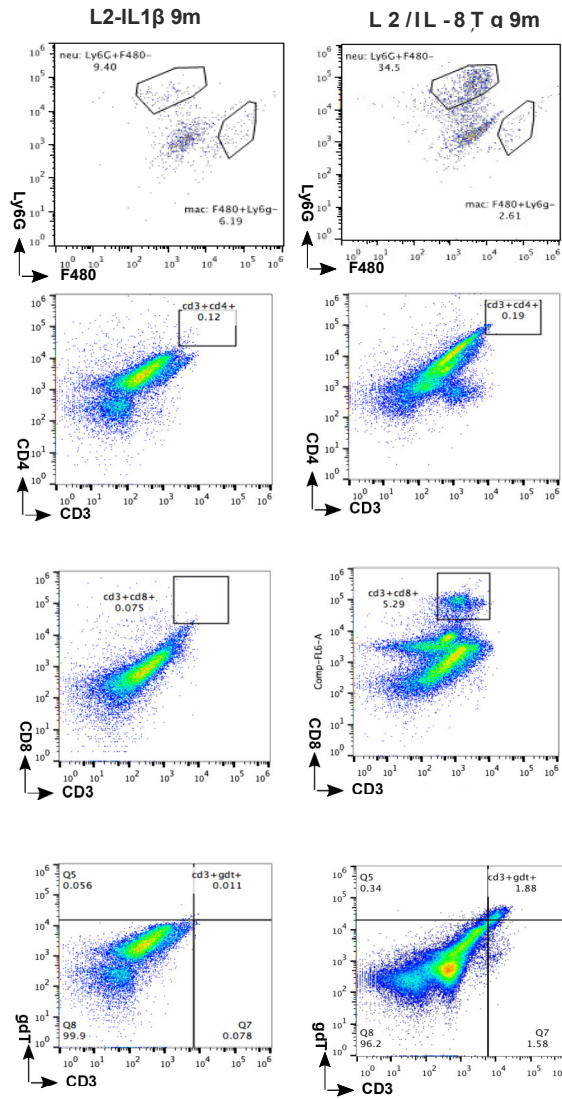

**B**

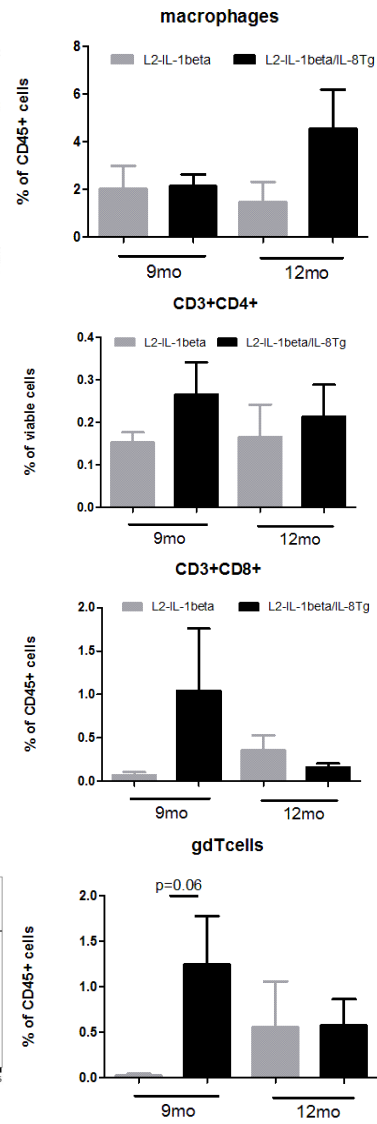

**C**

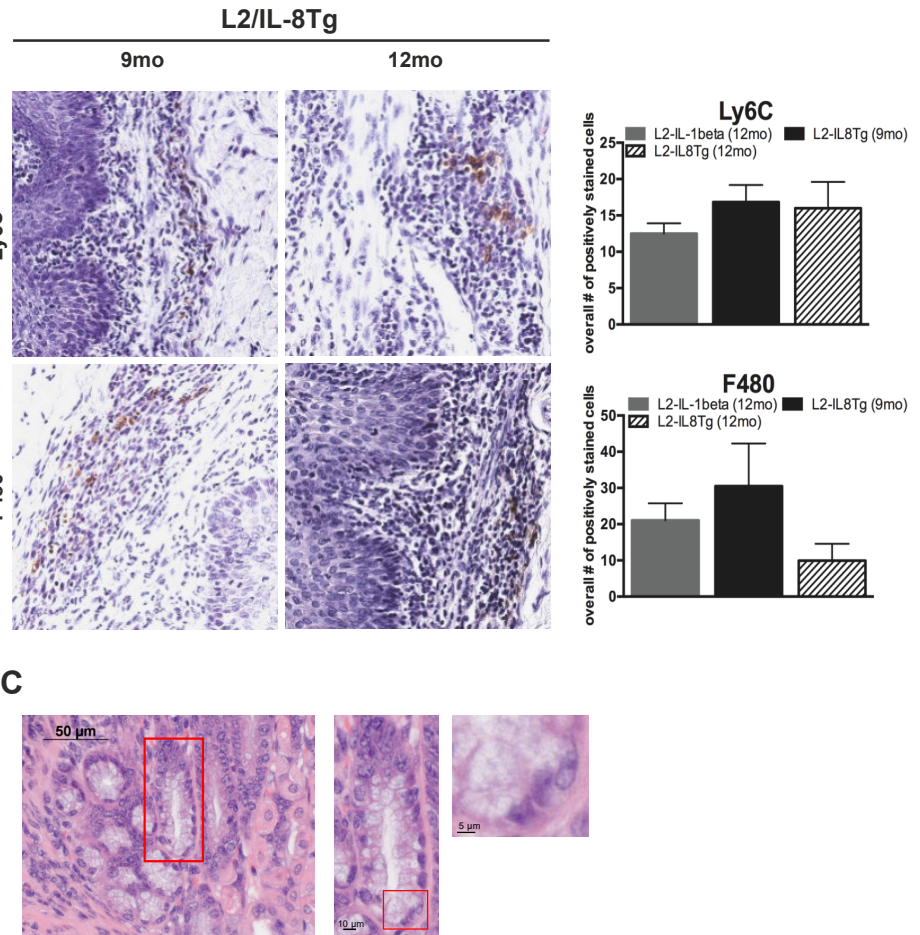

Supplemental Figure 7

A

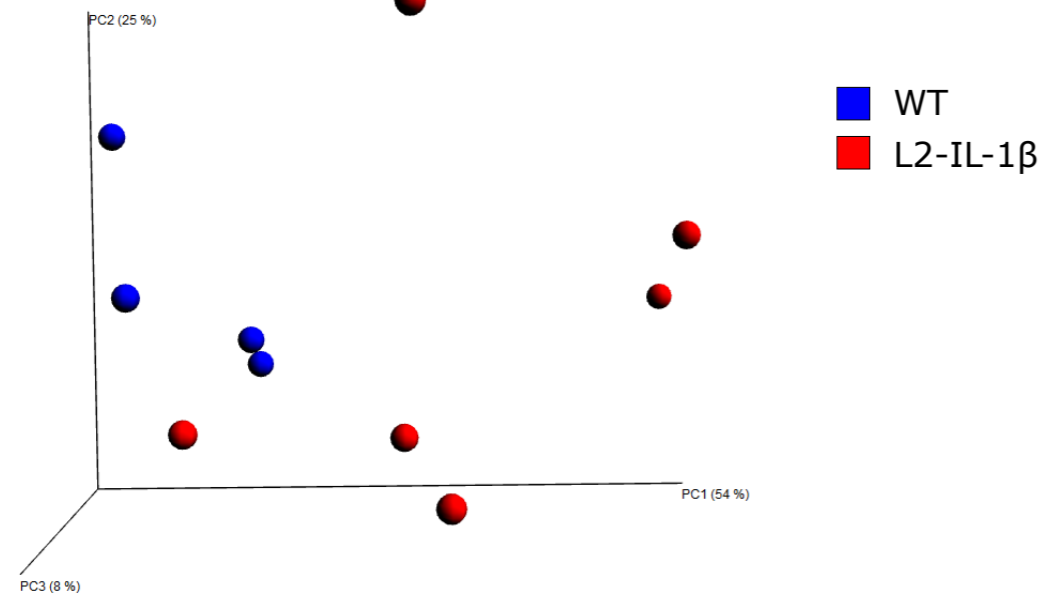

B

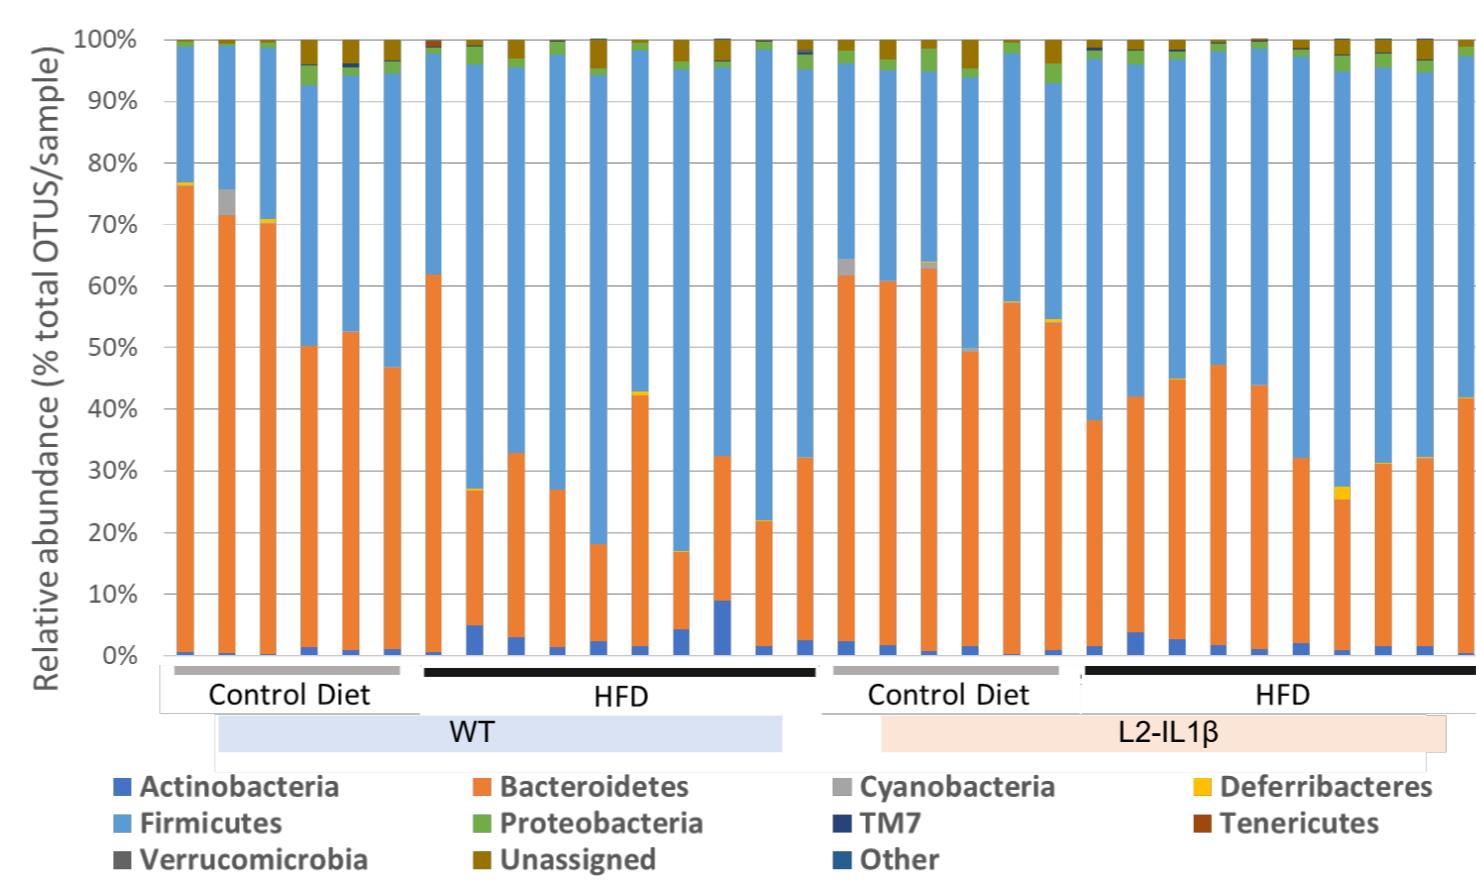

E

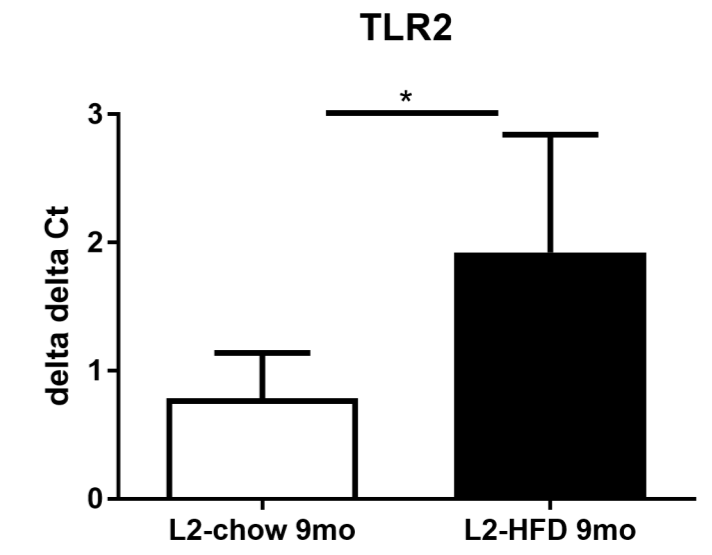

C

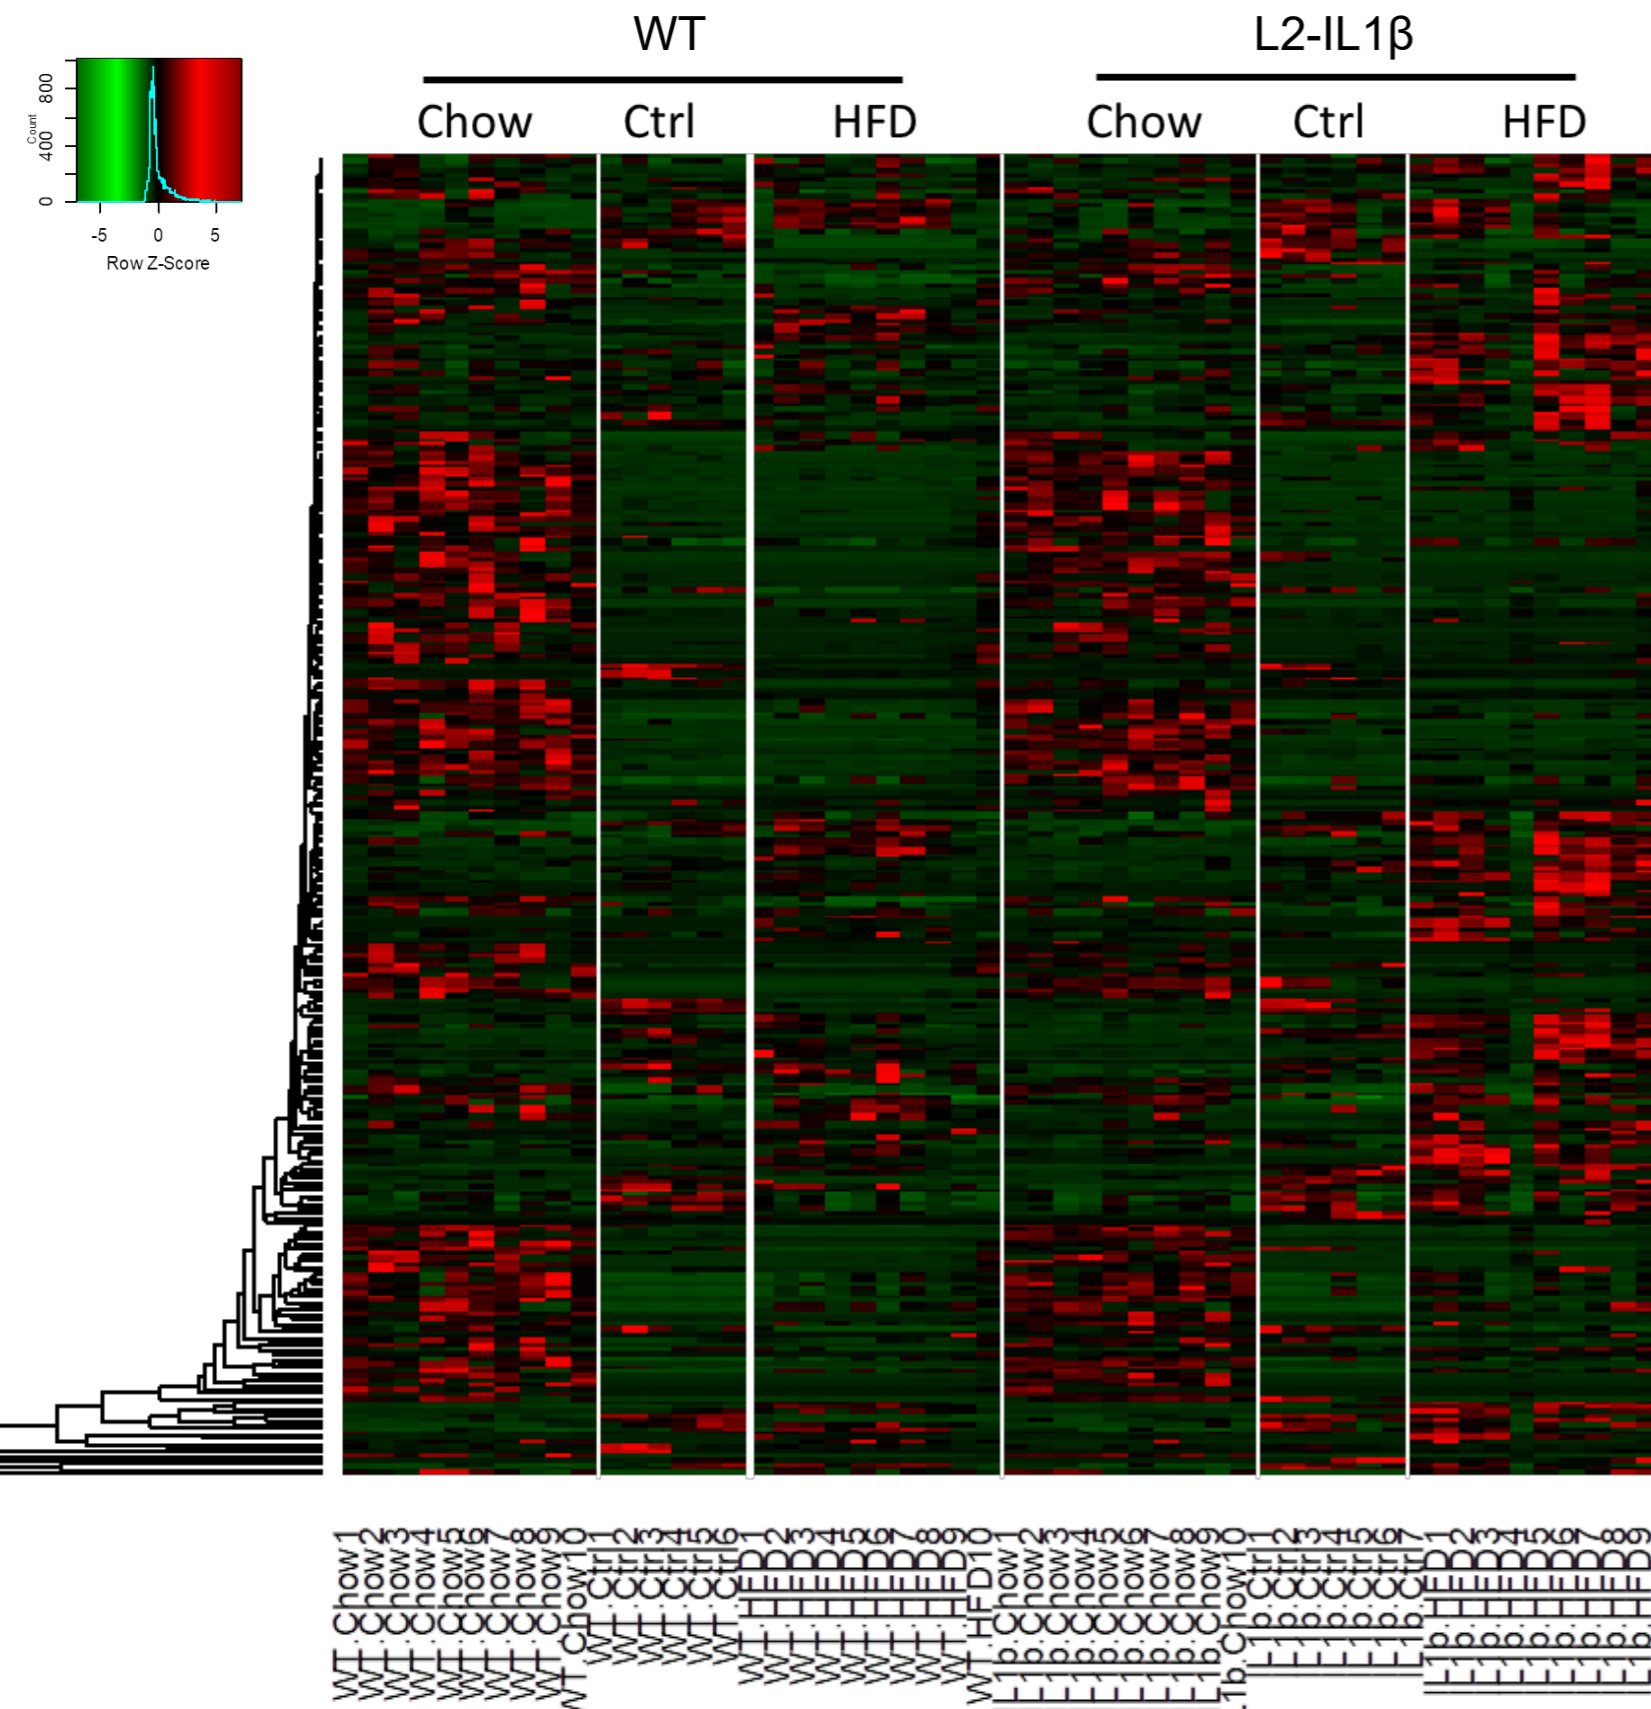

D

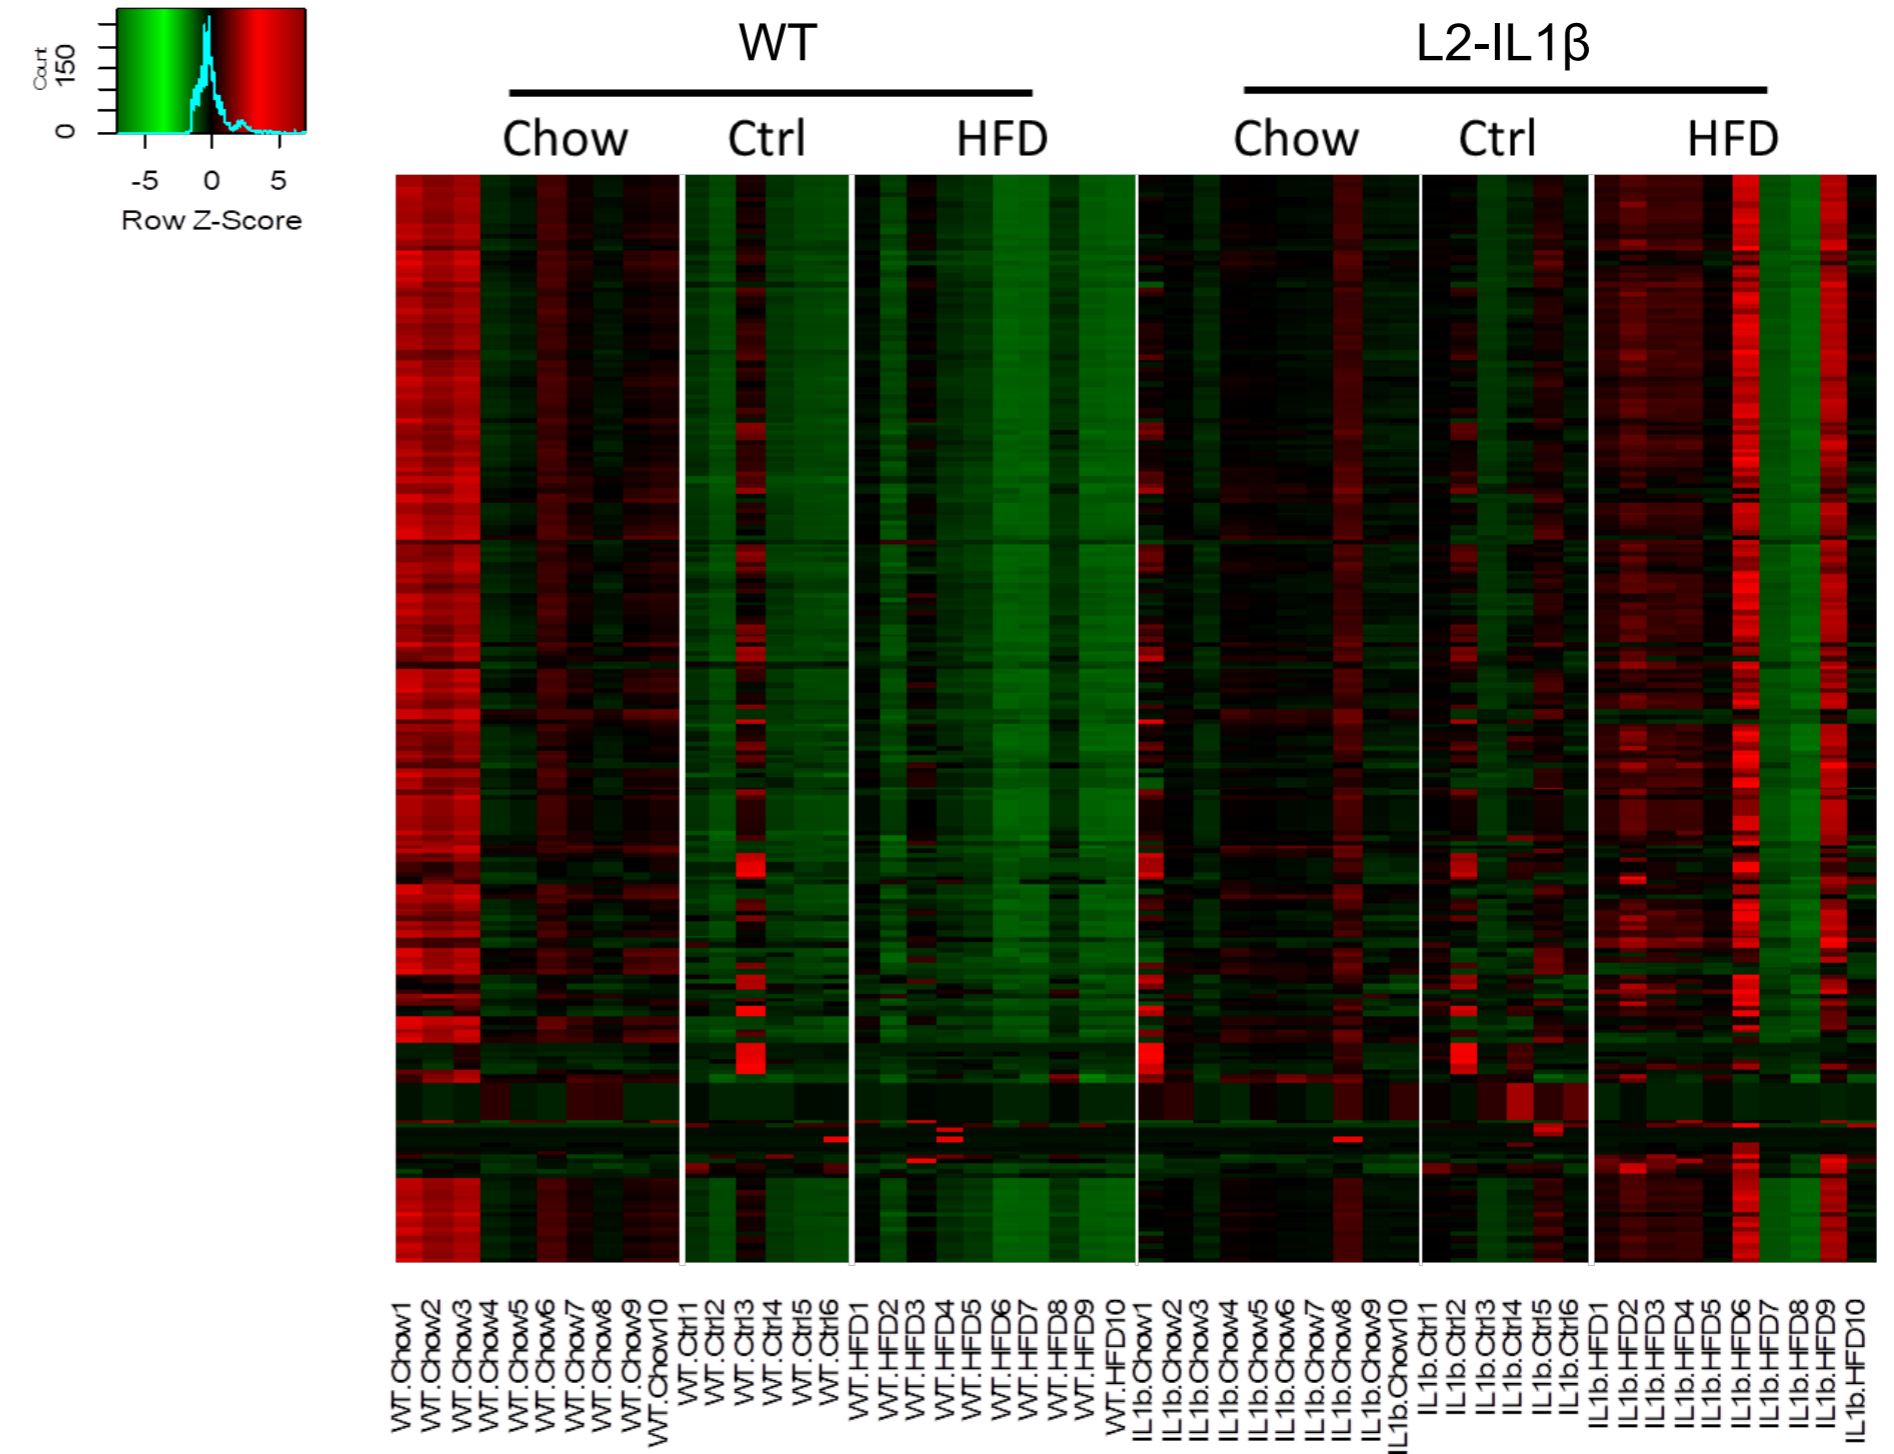

## Supplemental Figure8

**A**

|                                  | V1124-000     | S5745-E712   | S5745-E702 | RMH3000       |
|----------------------------------|---------------|--------------|------------|---------------|
| Dietary components               | Standard Chow | HFD Palm oil | Control    | Germfree Chow |
| <b>Gross Energy (GE)</b>         | 16.7 MJ/kg    | 21.9 MJ/kg   | 16.9 MJ/kg | 17.2          |
| <b>Metabolizable Energy (ME)</b> | 14.0 MJ/kg    | 19.7 MJ/kg   | 15.3 MJ/kg | 13.3888       |
| Protein [kJ%]                    | 27            | 18           | 23         | 23            |
| Fat [kJ%]                        | 12            | 48           | 13         | 14            |
| Carbohydrates [kJ%]              | 61            | 34           | 64         | 60            |
| <b>Crude Nutrients [%]</b>       |               |              |            |               |
| Protein                          | 22.0          | 21.2         | 21.2       | 22.5          |
| Fat                              | 4.5           | 25.1         | 5.1        | 5.4           |
| Fiber                            | 3.9           | 5.0          | 5.0        | 4.0           |
| Ash                              | 6.2           | 5.3          | 5.3        | 6.1           |
| Starch                           | 34.2          | 26.7         | 45.9       | 30.4          |
| Sugar                            | 5.1           | 6.1          | 6.1        | 1.3           |
| N free extracts                  | 51.2          | 37.7         | 56.8       | 52.0          |
| <b>Amino Acids [%]</b>           |               |              |            |               |
| Lysine                           | 1.5           | 1.8          | 1.8        | 1.3           |
| Methionine                       | 0.5           | 0.8          | 0.8        | 0.5           |
| Met + Cys                        | 0.4           | 1.1          | 1.1        | 0.8           |
| Threonine                        | 0.9           | 0.9          | 0.9        | 0.8           |
| Tryptophan                       | 0.3           | 0.3          | 0.3        | 0.3           |
| <b>Minerals [%]</b>              |               |              |            |               |
| Calcium                          | 1.0           | 0.9          | 0.9        | 1.0           |
| Phosphorus                       | 0.7           | 0.7          | 0.7        | 0.8           |
| Sodium                           | 0.2           | 0.2          | 0.2        | 0.3           |
| Magnesium                        | 0.2           | 0.2          | 0.2        | 0.2           |
| <b>Vitamins [IU/kg]</b>          |               |              |            |               |
| Vitamin A                        | 25,000.00     | 18,000.00    | 18,000.00  | 29,000.00     |
| Vitamin D <sub>3</sub>           | 1,500.00      | 1,800.00     | 1,800.00   | 2,400.00      |
| Vitamin E                        | 135           | 180          | 180        | 75            |
| <b>Fatty acids [%]</b>           |               |              |            |               |
| C 12:0                           | -             | 0.01         | 0.01       | NA            |
| C 14:0                           | 0.01          | 0.21         | 0.02       | NA            |
| C 16:0                           | 0.54          | 9.18         | 0.58       | NA            |
| C 18:0                           | 0.14          | 1.11         | 0.18       | NA            |
| C 20:0                           | 0.02          | 0.1          | 0.02       | NA            |
| C 16:1                           | 0.02          | 0.05         | 0.01       | NA            |
| C 18:1                           | 1.03          | 9.19         | 1.29       | NA            |
| C 18:2                           | 2.42          | 4.67         | 2.65       | 1.73          |
| C 18:3                           | 0.28          | 0.35         | 0.29       | 0.16          |

**B**

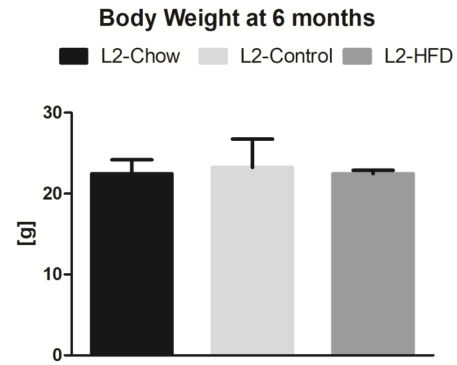

**D**

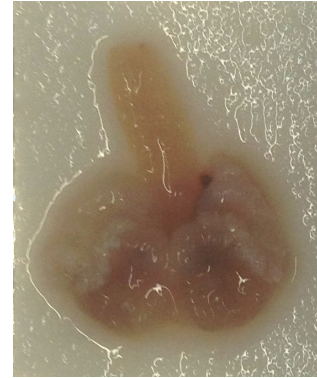

**C**

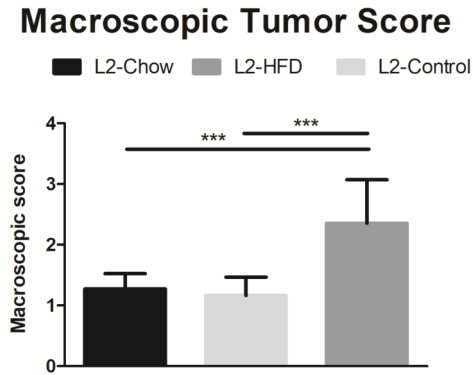

**E**

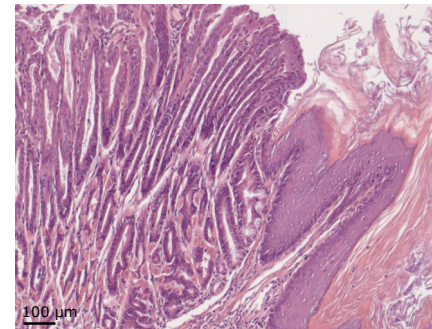

**F**

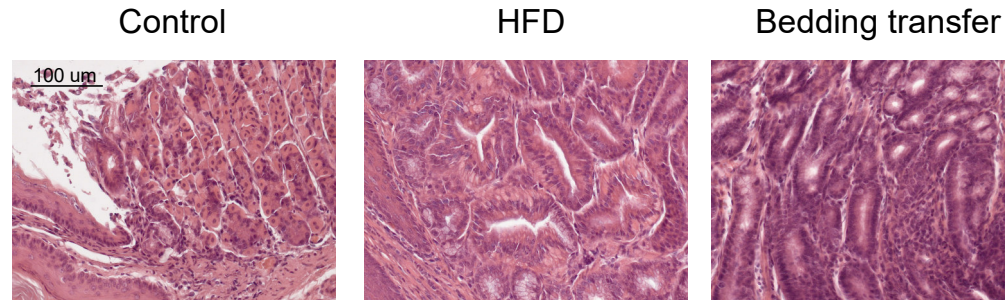



# Supplementary Figure9:

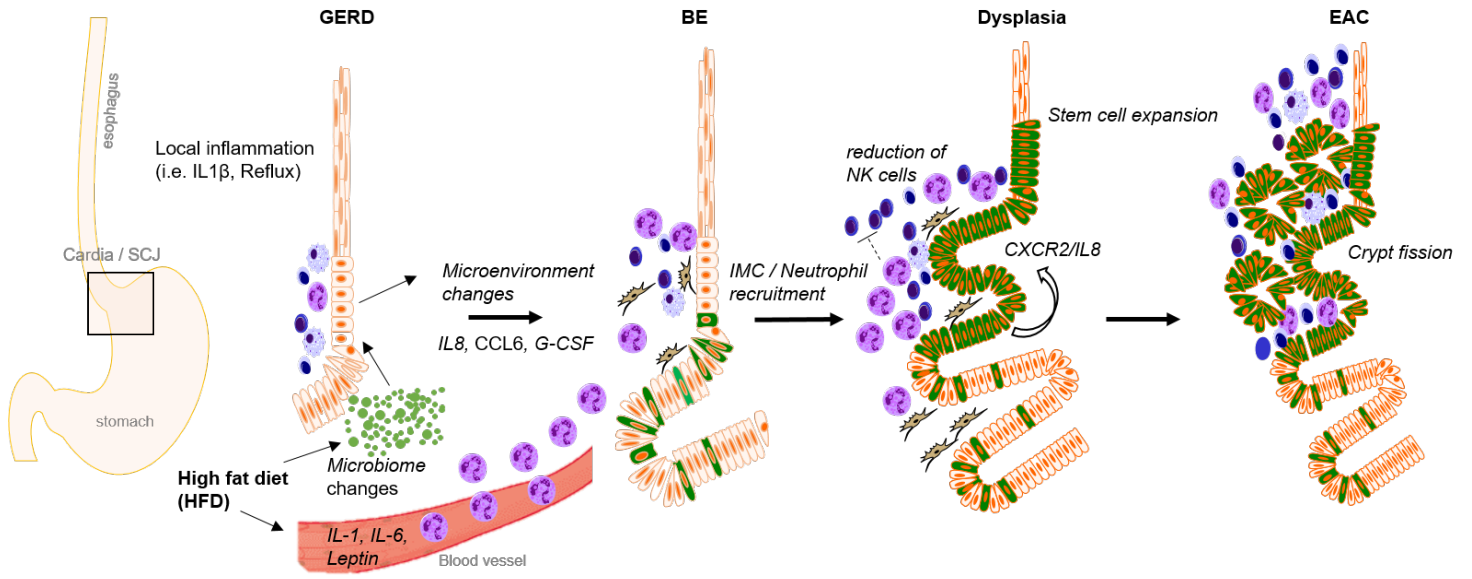

Supplement: NIHMS1527174-supplement-2.pdf [file NIHMS1527174-supplement-2.pdf]
